# Supplementary material
Source: Royal Society of Chemistry journal article supplement (doi:10.1039/d6ta00575f)
Supplement: d6ta00575f1.pdf [file d6ta00575f1.pdf]

## Supporting Information

# Graphitic Carbon Nitride Modified by Methyl Viologen and $I_3^-/I^-$ carrier relay for Improved Photocatalytic Hydrogen Evolution

*Tania Tofaz, Jing-Han Li, Shuai Chen, Hao-Yang Ding, Ru-Xin Tian, and An-Wu Xu\**

Division of Nanomaterials and Chemistry, Hefei National Research Center for Physical Sciences  
at the Microscale, University of Science and Technology of China, Hefei 230026, P. R. China.

Corresponding Author

\*E-mail: anwuxu@ustc.edu.cn (A.W. X)

## 1. Characterizations

X-ray diffraction (XRD) patterns were collected on a Rigaku TTR-III diffractometer (MXPAHF, Japan) with Cu K $\alpha$  irradiation ( $\lambda = 1.541 \text{ \AA}$ ), operating voltage of 40 kV, and a current of 200 mA. Fourier-transform infrared spectroscopy (FT-IR) analysis of the samples with KBr pellets was carried out using a Nicolet Nexus 8700 FT-IR spectrometer. The UV-Vis diffuse reflectance spectra (UV-Vis DRS) of the photocatalysts were recorded using a Shimadzu 3700DUV spectrophotometer, scanning with a wavelength range from 300 nm to 800 nm. Transmission electron microscopy (TEM) images were obtained using a JEM-2100 Plus transmission electron microscope operated at 200 kV. The X-ray photoelectron (XPS) spectra and valence band X-ray photoelectron spectra (VB-XPS) were recorded on a Thermo ESCALAB 250Xi spectrometer with an excitation source of monochromatized Al K $\alpha$  ( $h\nu = 1486.6 \text{ eV}$ ) and a pass energy of 30 eV. The values of binding energies were calibrated with the C 1s peak of contaminant carbon at 284.80 eV. The steady-state photoluminescence (PL) measurement was conducted on a fluorescence spectrophotometer (JY Fluorolog-3-Tau) with the excitation wavelength at 365 nm. Scanning electron microscopy (SEM, JEOL SM-6601F), and HAADF-STEM with corresponding EDS elemental mapping (HAADF-STEM JEOL-2010) were employed to evaluate the surface properties of the as-made samples. Kelvin probe force microscopy (KPFM) was analyzed using a conductive probe (SCM-PIT V2) on an Atomic Force Microscope (AFM, Bruker) Dimension Icon with an atmospheric environment. The multiple-point Brunauer-Emmett-Teller (BET) procedure was used to obtain specific areas of the samples. A Bruker AVANCE III 400 MHz WB solid-state Nuclear Magnetic Resonance Spectrometer was used for NMR spectra, where the  $^{13}\text{C}$  90-degree pulse length was 3.19  $\mu\text{s}$  @ 100 W. The electron paramagnetic resonance (EPR) spectrum of the

samples was obtained by a Bruker model JEOL JES-FA200 ESR. Microwave power employed was 1 mW; sweep width ranged from 223 to 423 mT. Modulation frequency and modulation width were 100 kHz and mT, respectively.

## **2. Photoelectrochemical Measurements**

The photoelectrochemical tests of the photocatalysts were measured at room temperature using a CHI 760E (Shanghai Chenhua Limited, China) electrochemical workstation based on a standard three-electrode system, that is made up of a saturated Ag/AgCl (in saturated KCl solution) as the reference electrode, a platinum wire as the counter electrode, a fluorine-doped tin oxide (FTO) glass deposited with the photocatalysts as the working electrode and Na<sub>2</sub>SO<sub>4</sub> (0.5 M, 100 mL) as the electrolyte solution. To make a working electrode, 2 mg of catalysts were dispersed into 1 mL ethanol containing 10  $\mu$ L Nafion (5 wt%, D520, DuPont Inc., USA) by ultrasonication. The resulting dispersion was then transferred onto a piece of FTO glass (an effective area of about 1.0 cm<sup>2</sup>) using a spin-coating method and dried at 60 °C for 2 h in an oven to form the final electrode.

The transient photocurrent responses were tested for each switch on/off (300 W Xe lamp) event with a bias voltage of 0.5 V. The electrochemical impedance spectroscopy (EIS) curves were measured under visible light and a bias of -0.2 V to evaluate the charge-transfer ability of the catalysts, and its frequency ranging from 10 MHz to 100 KHz.

## **3. Photocatalytic Hydrogen Evolution Measurements**

Photocatalytic H<sub>2</sub> evolution from water splitting was carried out in a Pyrex top-irradiation reaction vessel (500 mL) connected to a glass-closed gas circulation and evacuation system (Prefect Light, Beijing, Labsolar-6A). In a typical experiment, a 50 mg photocatalyst was dispersed in a 100 mL aqueous solution containing 10 vol% TEOA as a sacrificial reagent. Then, 1 wt% Pt was loaded onto the photocatalyst surface by photo-deposition of H<sub>2</sub>PtCl<sub>6</sub>·6H<sub>2</sub>O, serving as a co-catalyst. The suspension was evacuated several times to remove air and other gases completely, then irradiated by a 300 W Xenon lamp. An appropriate long-pass cut-off filter ( $\lambda \geq 420$  nm) was employed to remove UV light and achieve visible-light irradiation. Additionally, the Pyrex reactor with a double layer was continuously stirred during the photocatalytic reaction, and the temperature of the reaction solution was maintained at 6 °C by a flow of cooling water. The amount of hydrogen evolution from the photocatalytic splitting of water was analyzed by using an online gas chromatograph (GC1120, Shanghai Sunny Hengping Limited) with a thermal conductivity detector (TCD) and a capillary column (5 Å molecular sieve). High-purity nitrogen was used as a carrier gas. The photocatalytic reaction time for each experiment was set as 4 h.

The AQE of CN-KI<sub>3</sub>-KI-MV 1% at different monochromatic lights ( $\lambda = 420, 450, 500, \text{ and } 550$  nm  $\pm 5$  nm) was calculated via the following equation:

$$AQE = \frac{\text{number of evolved } H_2 \text{ molecules} \times 2}{\text{incident photons number}} \times 100\%$$

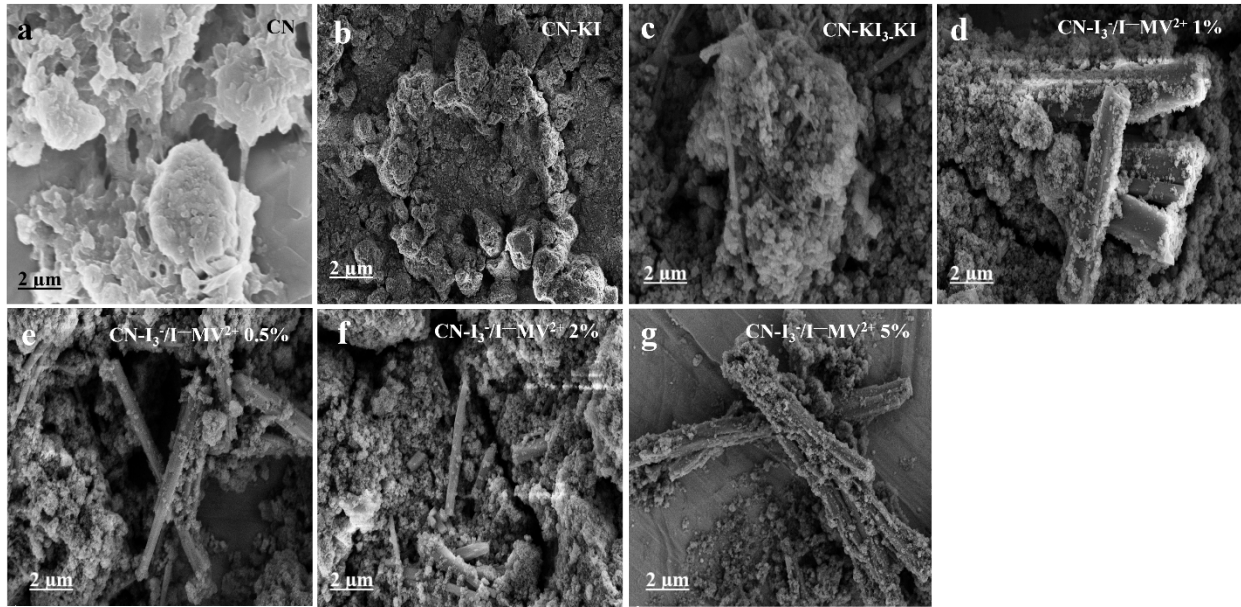

**Fig. S1.** SEM images of a) CN, b) CN-KI, c) CN-KI<sub>3</sub>-KI, d) CN-I<sub>3</sub><sup>-</sup>/I<sup>-</sup>-MV<sup>2+</sup> 1%, e) CN-I<sub>3</sub><sup>-</sup>/I<sup>-</sup>-MV<sup>2+</sup> 0.5%, f) CN-I<sub>3</sub><sup>-</sup>/I<sup>-</sup>-MV<sup>2+</sup> 2%, and g) CN-I<sub>3</sub><sup>-</sup>/I<sup>-</sup>-MV<sup>2+</sup> 5% samples.

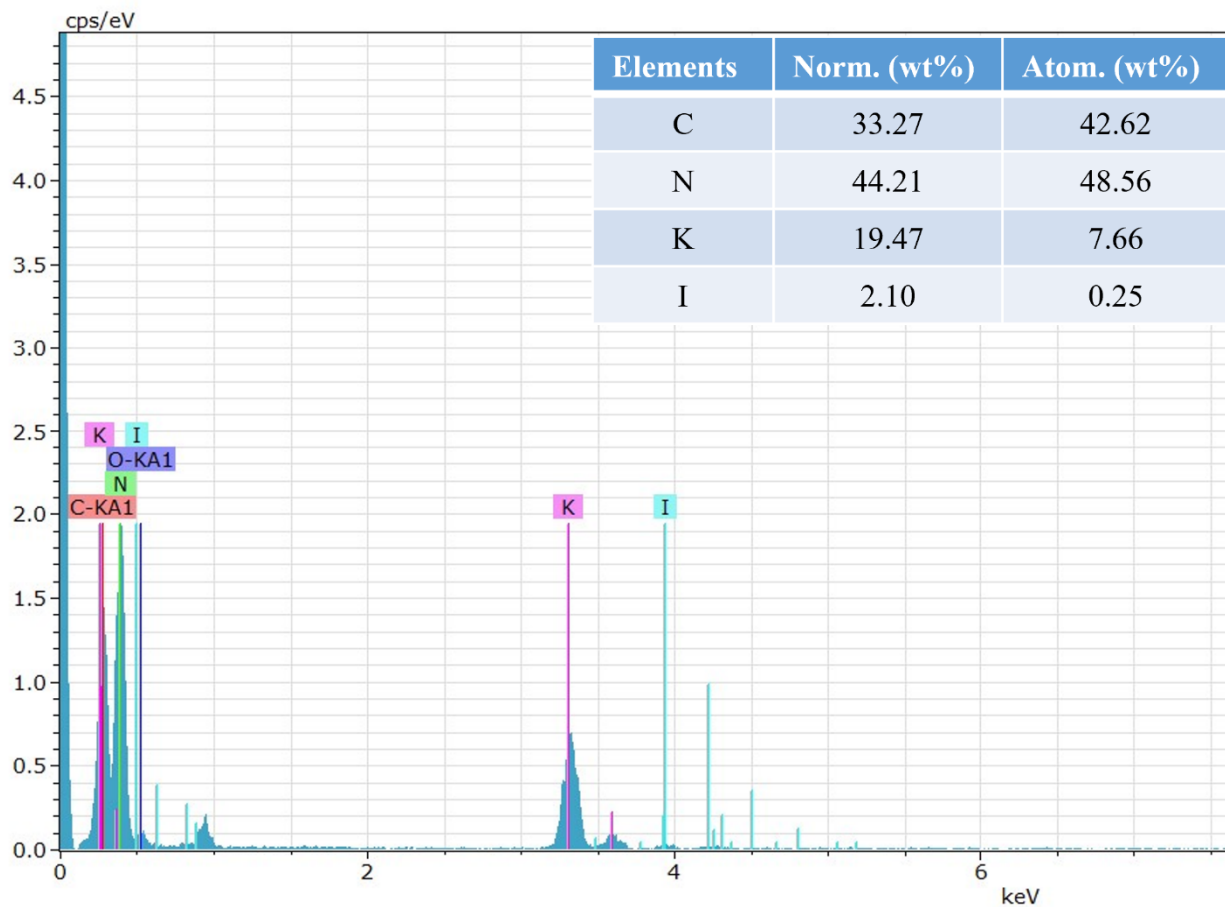

**Fig. S2.** EDS spectrum of CN-I<sub>3</sub><sup>-</sup>/I<sup>-</sup>-MV<sup>2+</sup> 1% composite.

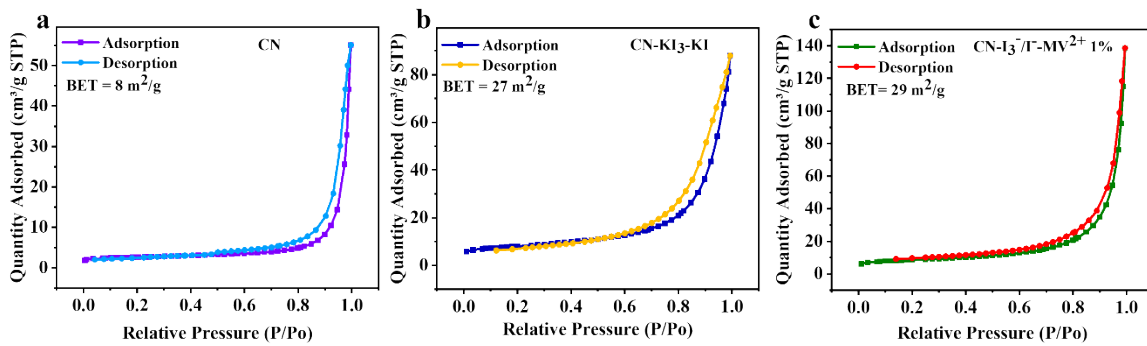

**Fig. S3:** N<sub>2</sub> adsorption-desorption isotherms of a) CN, b) CN-KI<sub>3</sub>-KI, and c) CN-I<sub>3</sub><sup>-</sup>/I<sup>-</sup>-MV<sup>2+</sup> 1% photocatalysts.

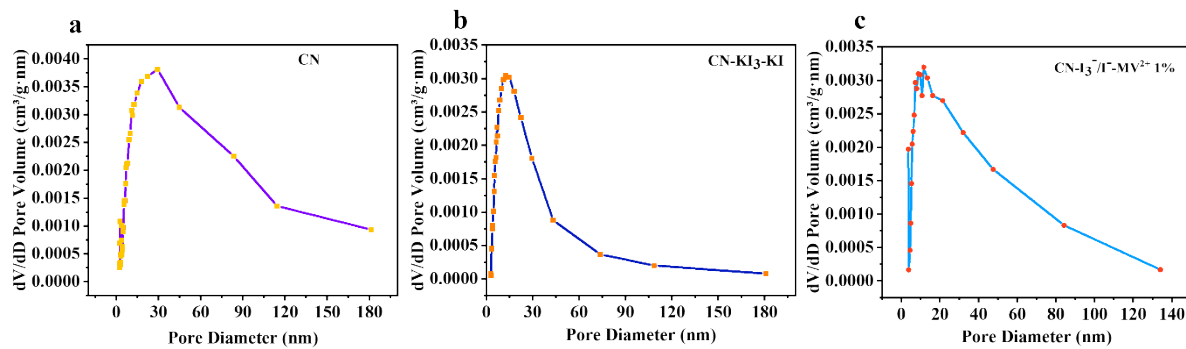

**Fig. S4:** Pore distribution of a) CN, b) CN-KI<sub>3</sub>-KI, and c) CN-I<sub>3</sub><sup>-</sup>/I<sup>-</sup>-MV<sup>2+</sup> 1% samples.

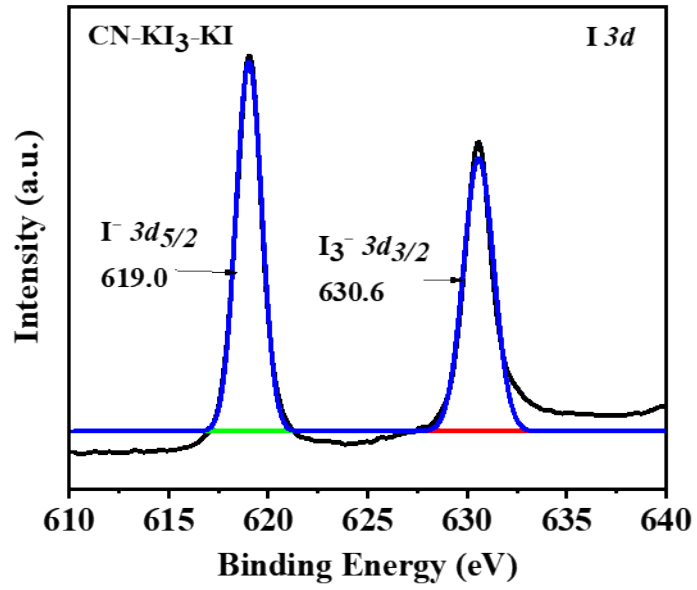

Fig. S5. XPS spectra of I 3d of CN-KI<sub>3</sub>-KI photocatalyst.

**Table S1:** The position attribution of characteristic peaks in the C 1s spectrum.

| Sample                                                              | N-C=N  | C-NH <sub>x</sub> /C≡N | C-C    |
|---------------------------------------------------------------------|--------|------------------------|--------|
| CN                                                                  | 287.97 | 286.15                 | 284.66 |
| CN-KI <sub>3</sub> -KI                                              | 288.04 | 286.35                 | 284.81 |
| CN-I <sub>3</sub> <sup>-</sup> /I <sup>-</sup> -MV <sup>2+</sup> 1% | 288.01 | 286.25                 | 284.72 |

**Table S2:** The position attribution of characteristic peaks in the N 1s spectrum.

| Sample                                                              | C-N-H  | N-C <sub>3</sub> | C-N=C  |
|---------------------------------------------------------------------|--------|------------------|--------|
| CN                                                                  | 401.07 | 399.51           | 398.45 |
| CN-KI <sub>3</sub> -KI                                              | 401.87 | 400.08           | 398.57 |
| CN-I <sub>3</sub> <sup>-</sup> /I <sup>-</sup> -MV <sup>2+</sup> 1% | 400.76 | 938.70           | 398.18 |

**Table S3:** The position attribution of characteristic peaks in the I 3*d* spectrum.

| Sample                                                              | I <sup>-</sup> 3 <i>d</i> <sub>3/2</sub> | I <sub>3</sub> <sup>-</sup> 3 <i>d</i> <sub>3/2</sub> |
|---------------------------------------------------------------------|------------------------------------------|-------------------------------------------------------|
| CN-KI <sub>3</sub> -KI                                              | 619.01                                   | 630.60                                                |
| CN-I <sub>3</sub> <sup>-</sup> /I <sup>-</sup> -MV <sup>2+</sup> 1% | 618.98                                   | 630.56                                                |

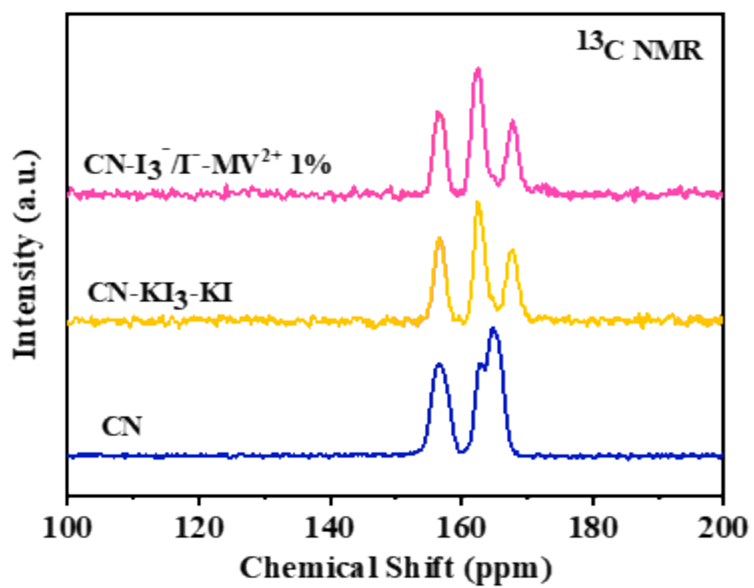

**Fig. S6:**  $^{13}\text{C}$  NMR spectra of CN, CN-KI<sub>3</sub>-KI, and CN-I<sub>3</sub><sup>-</sup>/I<sup>-</sup>-MV<sup>2+</sup> 1% composites.

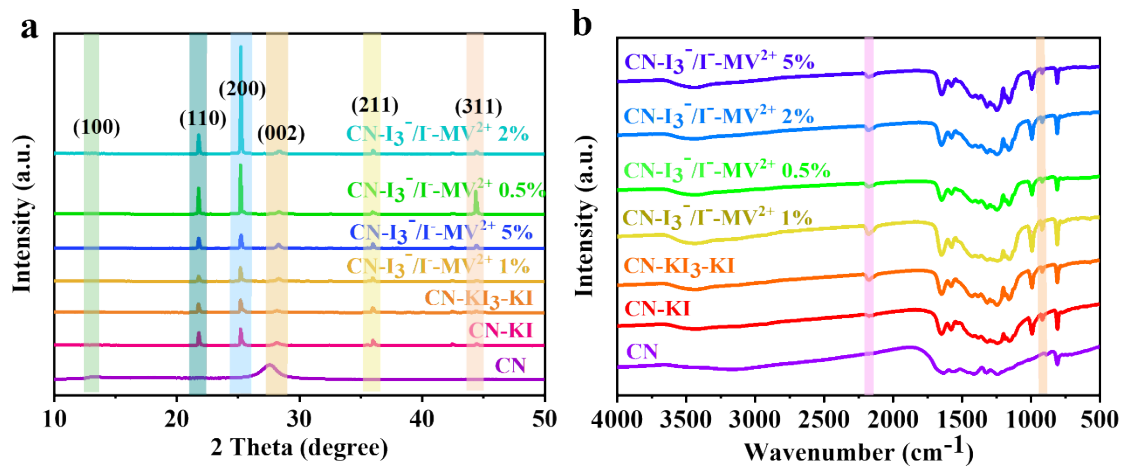

**Fig. S7:** a) XRD pattern and b) FT-IR spectrum of all synthesized composites.

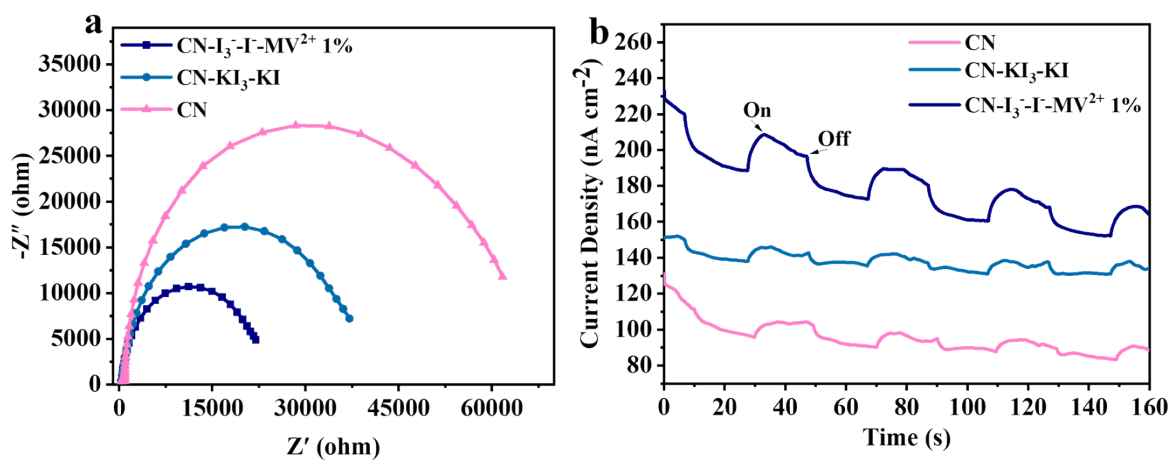

**Fig. S8:** a) Electrochemical impedance spectra and b) transient photocurrent response spectra of CN, CN-KI<sub>3</sub>-KI, and CN-I<sub>3</sub><sup>-</sup>-I<sup>-</sup>-MV<sup>2+</sup> 1% samples.

**Table S4.** Comparison of our study H<sub>2</sub> evolution results with previously reported other CN photocatalysts.

| S.# | Photocatalysts                                                      | Reaction conditions          | Light source (300 W Xe-lamp)              | H <sub>2</sub> evolution rate (μmol h <sup>-1</sup> ) | Refs      |
|-----|---------------------------------------------------------------------|------------------------------|-------------------------------------------|-------------------------------------------------------|-----------|
| 1.  | CN-I <sub>3</sub> <sup>-</sup> /I <sup>-</sup> -MV <sup>2+</sup> 1% | TEOA (10 vol. %), 1 wt% Pt   | λ ≥ 420 nm (visible-light)                | 136.67                                                | This work |
| 2.  | K10-g-C <sub>3</sub> N <sub>4</sub>                                 | TEOA (10 vol. %), 0.5 wt% Pt | λ ≥ 420 nm (visible-light)                | 102.8                                                 | 1         |
| 3.  | CM-K <sub>12</sub>                                                  | TEOA (10 vol. %), 1 wt% Pt   | λ > 420 nm (visible-light)                | 127.78                                                | 2         |
| 4.  | CNBS                                                                | TEOA (10 vol. %), 1 wt% Pt   | 150 W Xe-lamp, λ > 420 nm (visible-light) | 53.2                                                  | 3         |
| 5.  | CN-MV-10                                                            | TEOA (10 vol. %), 3 wt% Pt   | λ > 420 nm (visible-light)                | 33.0                                                  | 4         |
| 6.  | C <sub>3</sub> N <sub>4</sub> /CBV <sup>2+</sup>                    | TEOA (10 vol. %), 1 wt% Pt   | λ ≥ 420 nm (visible-light)                | 41.57                                                 | 5         |
| 7.  | CNUS                                                                | TEOA (10 vol. %), 1 wt% Pt   | λ ≥ 420 nm (visible-light)                | 109.3                                                 | 6         |
| 8.  | C <sub>3</sub> N <sub>4+x</sub>                                     | TEOA (10 vol. %), 1 wt% Pt   | λ ≥ 420 nm (visible-light)                | 44.28                                                 | 7         |
| 9.  | MCN-1                                                               | TEOA (10 vol. %), 1 wt% Pt   | λ ≥ 420 nm (visible-light)                | 60.2                                                  | 8         |
| 10. | C <sub>3</sub> N <sub>4</sub> /CoTPP                                | TEOA (10 vol. %), 1 wt% Pt   | λ ≥ 420 nm (visible-light)                | 46.93                                                 | 9         |
| 11. | P-TCN                                                               | TEOA (10 vol. %), 1 wt% Pt   | λ ≥ 420 nm (visible-light)                | 67                                                    | 10        |
| 12. | MoS <sub>2</sub> /g-C <sub>3</sub> N <sub>4</sub>                   | TEOA (10 vol. %), 2 wt% Pt   | λ ≥ 420 nm (visible-light)                | 43.38                                                 | 11        |
| 13. | CoP-CN                                                              | TEOA (10 vol. %), 2 wt% Pt   | λ ≥ 420 nm (visible-light)                | 51.9                                                  | 12        |

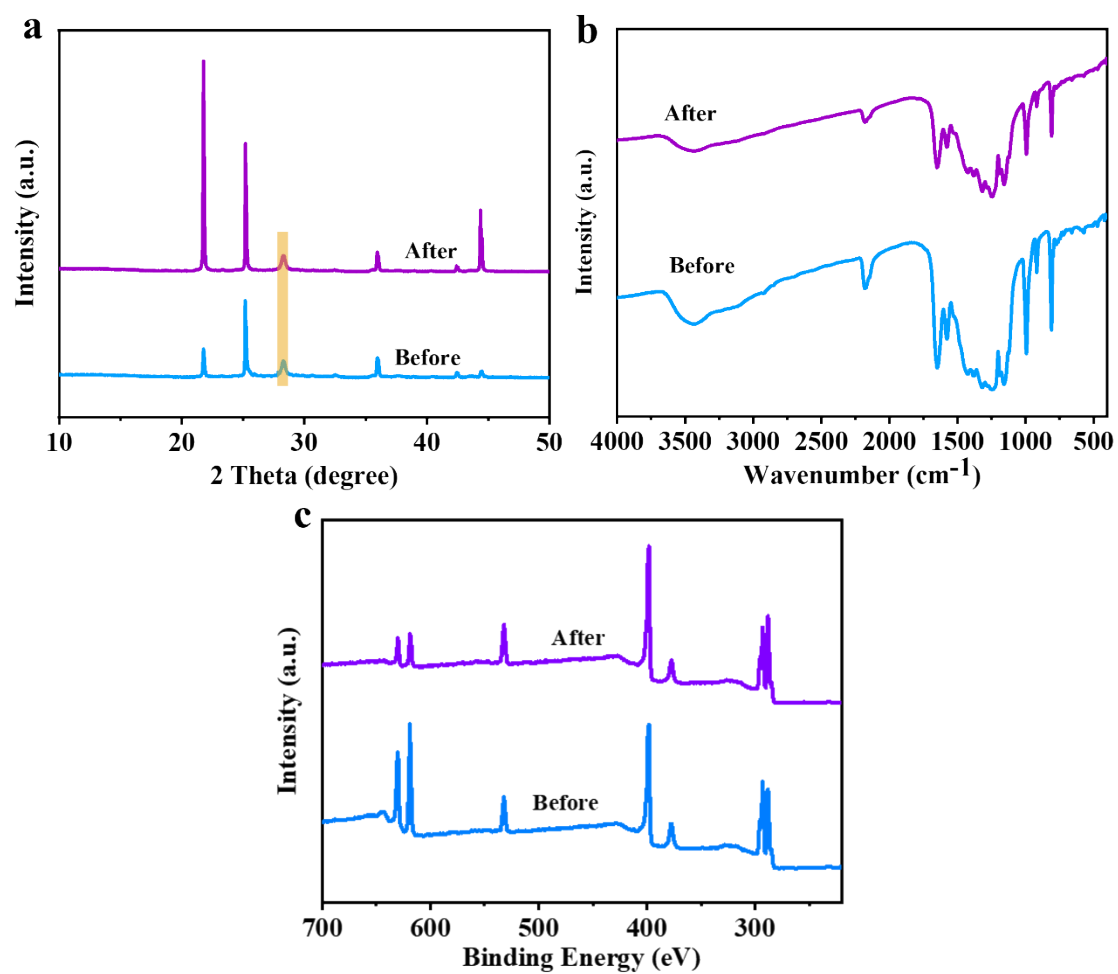

**Fig. S9.** a) XRD patterns, b) FTIR spectra, and c) XPS survey spectra of CN-I<sub>3</sub><sup>-</sup>/I<sup>-</sup>-MV<sup>2+</sup> 1% sample before and after the photocatalytic reaction.

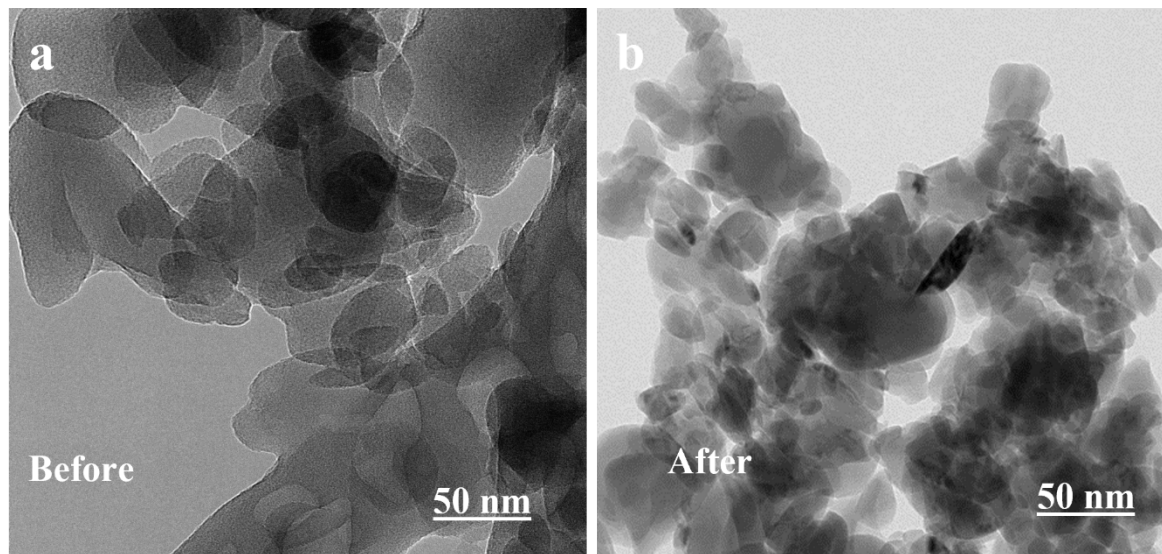

**Fig. S10:** TEM images of the  $\text{CN-I}_3^-/\text{I}^- \text{-MV}^{2+}$  1% sample before and after the photocatalytic reaction.

## References

- 1 M. Wu, J. M. Yan, X. N. Tang, M. Zhao and Q. Jiang, *ChemSusChem*, 2014, **7**, 2654–2658.
- 2 X. J. Lu, C. Z. Yuan, S. Chen, J. H. Li, I. Ullah, M. Qi and A. W. Xu, *Langmuir*, 2024, **40**, 11067–11077.
- 3 P. Babu, S. Mohanty, B. Naik and K. Parida, *ACS Appl. Energy Mater.*, 2018, **1**, 5936–5947.
- 4 F. Bu, R. Yuan, Z. Zhang, J. Wang, J. Liu and Y. C. Yong, *Inorg. Chem. Front.*, 2025, **12**, 801-811.
- 5 Y. N. Liu, C. C. Shen, N. Jiang, Z. W. Zhao, X. Zhou, S. J. Zhao and A. W. Xu, *ACS Catal.*, 2017, **7**, 8228–8234.

- 6 Z. Chen, T. Fan, M. Shao, X. Yu, Q. Wu, J. Li, W. Fang and X. Yi, *Appl. Catal. B*, 2019, **242**, 40–50.
- 7 J. Fang, H. Fan, M. Li and C. Long, *J. Mater. Chem. A Mater.*, 2015, **3**, 13819–13826.
- 8 Z. F. Huang, J. Song, L. Pan, Z. Wang, X. Zhang, J. J. Zou, W. Mi, X. Zhang and L. Wang, *Nano Energy*, 2015, **12**, 646–656.
- 9 M. Kombo, L. B. Ma, Y. N. Liu, X. X. Fang, N. Ullah, A. H. Odda and A. W. Xu, *Catal. Sci. Technol.*, 2019, **9**, 2196–2202.
- 10 S. Guo, Z. Deng, M. Li, B. Jiang, C. Tian, Q. Pan and H. Fu, *Angew. Chem. Int. Ed.*, 2016, **55**, 1830–1834.
- 11 Y. Liu, X. Xu, J. Zhang, H. Zhang, W. Tian, X. Li, M. O. Tade, H. Sun and S. Wang, *Appl. Catal. B*, 2018, **239**, 334–344.
- 12 Y. Liu, J. Zhang, X. Li, Z. Yao, L. Zhou, H. Sun and S. Wang, *Energy and Fuels*, 2019, **33**, 11663–11676.
